# Supplementary material
Source: publisher figshare collection journal article supplement (https://plos.figshare.com/articles/dataset/_/3770934)

# A SLFS, $n=40, 50, 62, 70$

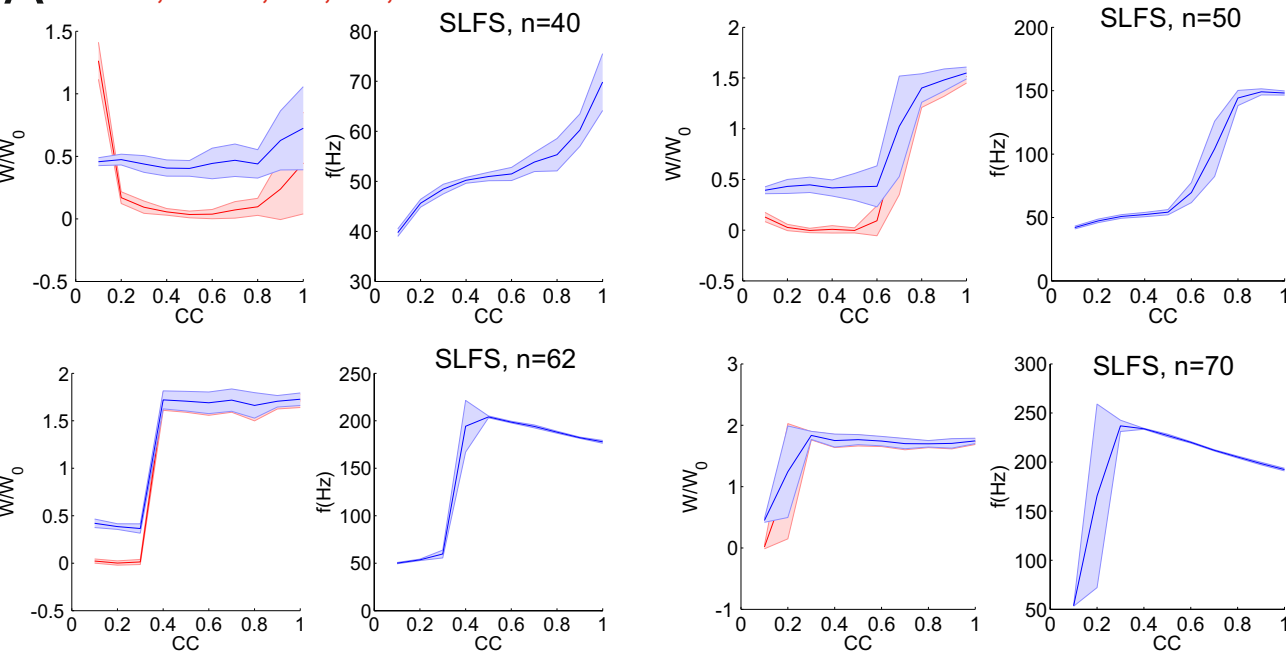

# B WLFS, $n=40, 50, 62, 70$

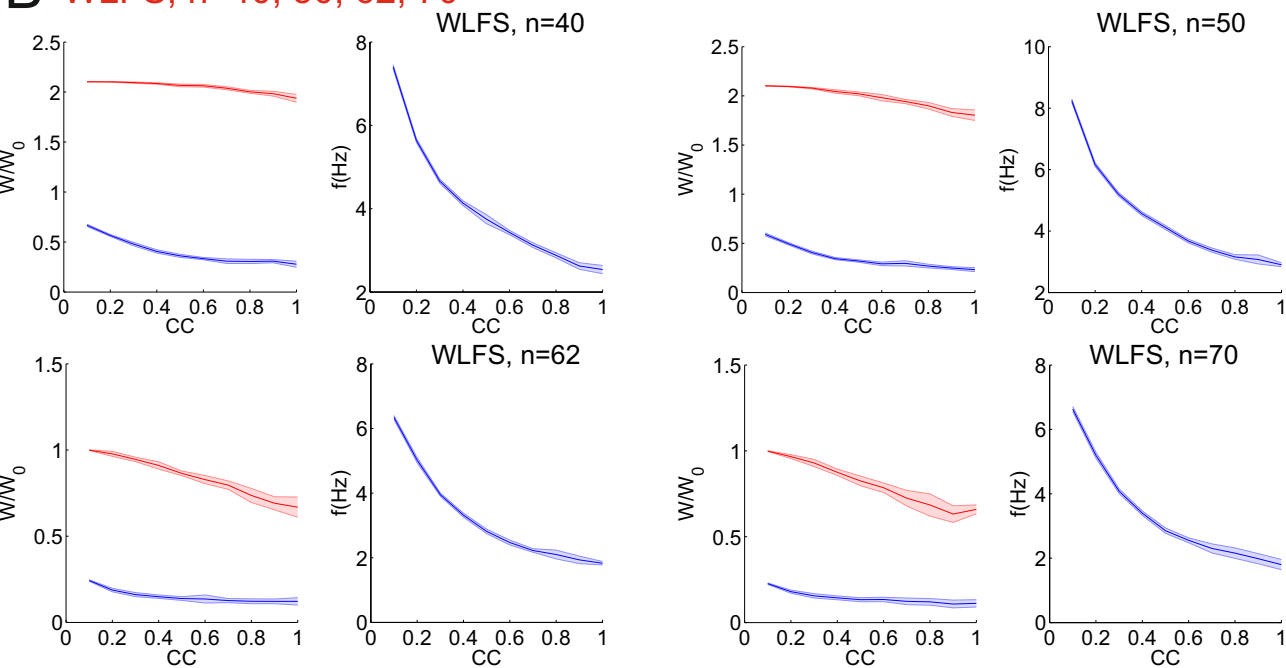

Supplement: Supplementary file [file 1]
