# Supplementary material
Source: publisher figshare collection journal article supplement (https://plos.figshare.com/articles/dataset/_/3770934)

# A STET, $n=4, 8, 11, 14$

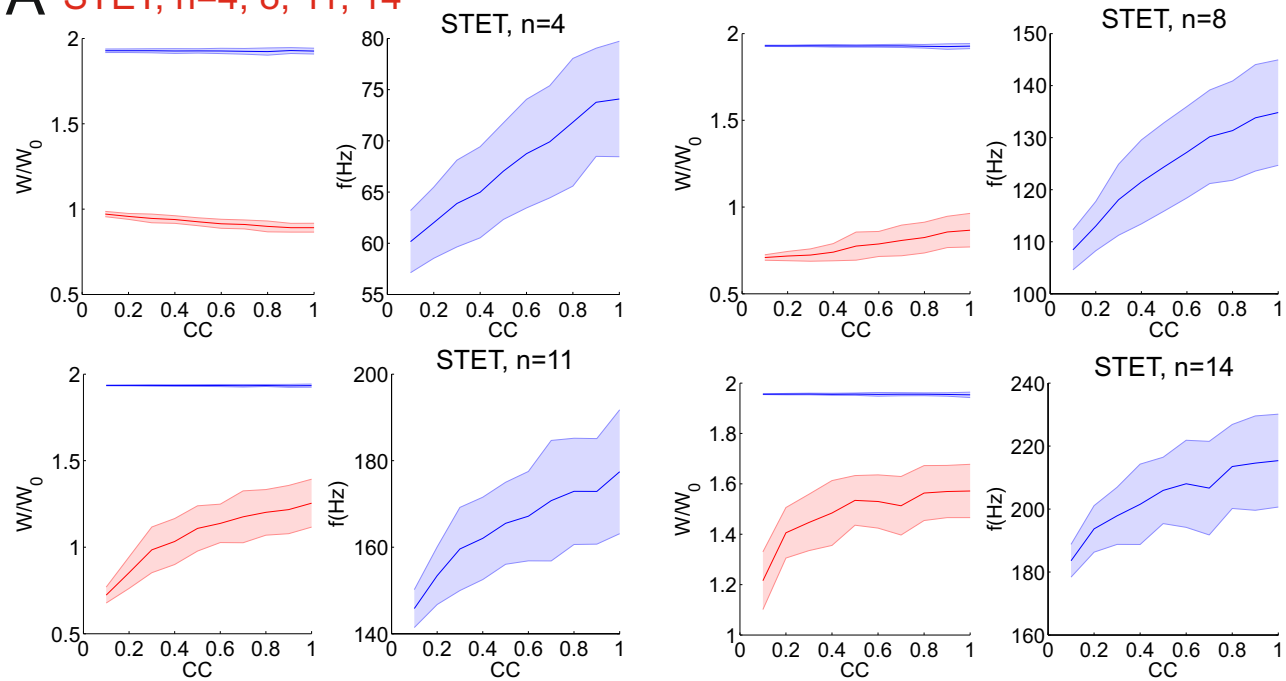

# B WTET, $n=4, 8, 11, 14$

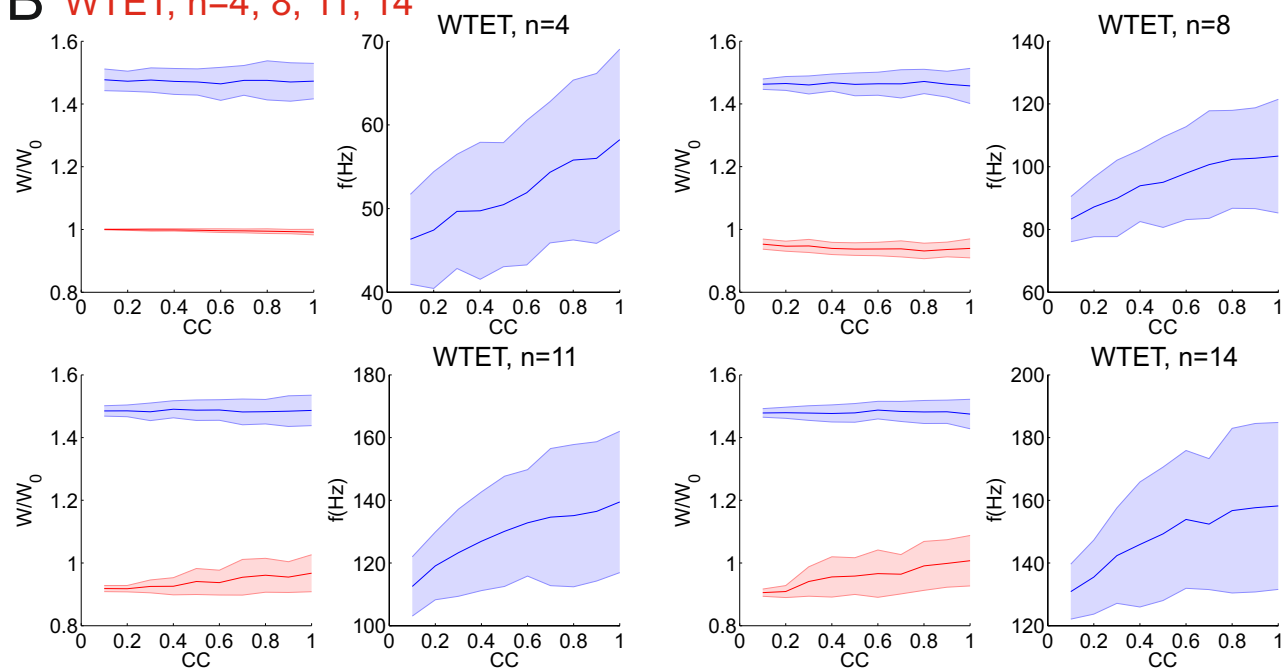

Supplement: Supplementary file [file 1]
